# Supplementary material for: Analysis of the Seasonal Fluctuation of γδ T Cells and Its Potential Relation with Vitamin D3
Source: MDPI journal article supplement (doi:10.3390/cells11091460), 2022-04-26
Supplement: s1 [file s1]

# **Supplemental Material**

## **Analysis of the seasonal fluctuation of $\gamma\delta$ T cells and its potential relation with Vitamin D<sub>3</sub>**

**Birthe Bernicke, Nils Engelbogen, Katharina Klein, Jeanette Franzenburg, Christoph Borzikowsky, Christian Peters, Ottmar Janssen, Ralf Junker, Ruben Serrano and Dieter Kabelitz**

## **Supplemental Table 1:**

### **Characteristics of 31 prospective study group participants**

**Gender:** 14 males  
17 females

**Age:** mean  $27.3 \pm 3.3$  years, range 22 to 35 years

#### **Oral Vitamin D uptake\*:**

Group 1 (none): 14 (6 males, 8 females)

Group 2 (interrupted during summer): 8

Group 3 (regular throughout year): 9

\* Vitamin D uptake: minimum 500 I.E. per day, maximum 20,000 I.E. per day, mean  $1,877 \pm 1,968$  I.E. per day

## Supplemental Figure S1:

### Gating strategy for retrospective analysis

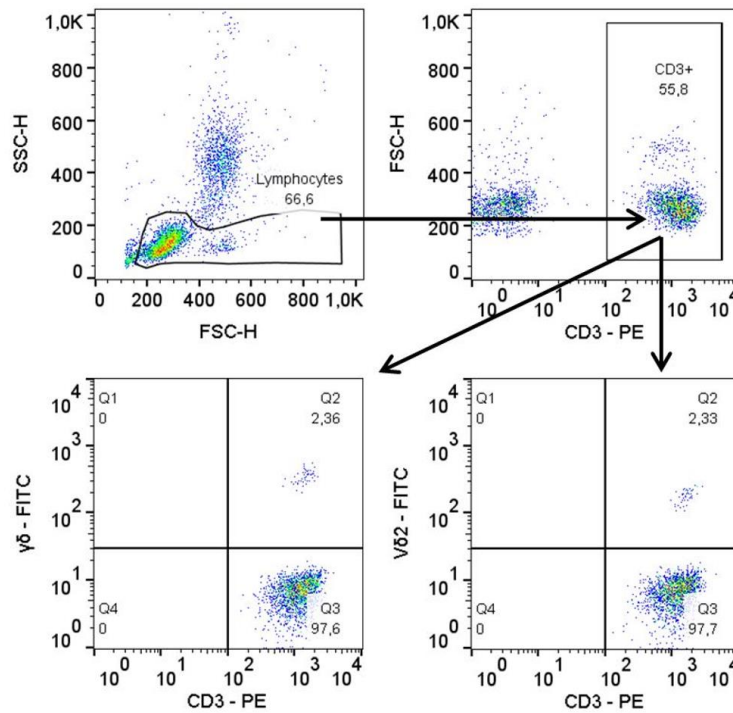

A gate was set on lymphocytes based on forward scatter (FSC) and side scatter (SSC) (upper left). Next, CD3<sup>+</sup> T cells were identified (upper right), and CD3<sup>+</sup> T cells were then gated according to CD3 and TCRγδ expression (lower left) and CD3 and Vδ2 expression (lower right).

## Supplemental Figure S2:

### Mean values of total $\gamma\delta$ T cells and V $\delta$ 2 T cells in retrospective analysis

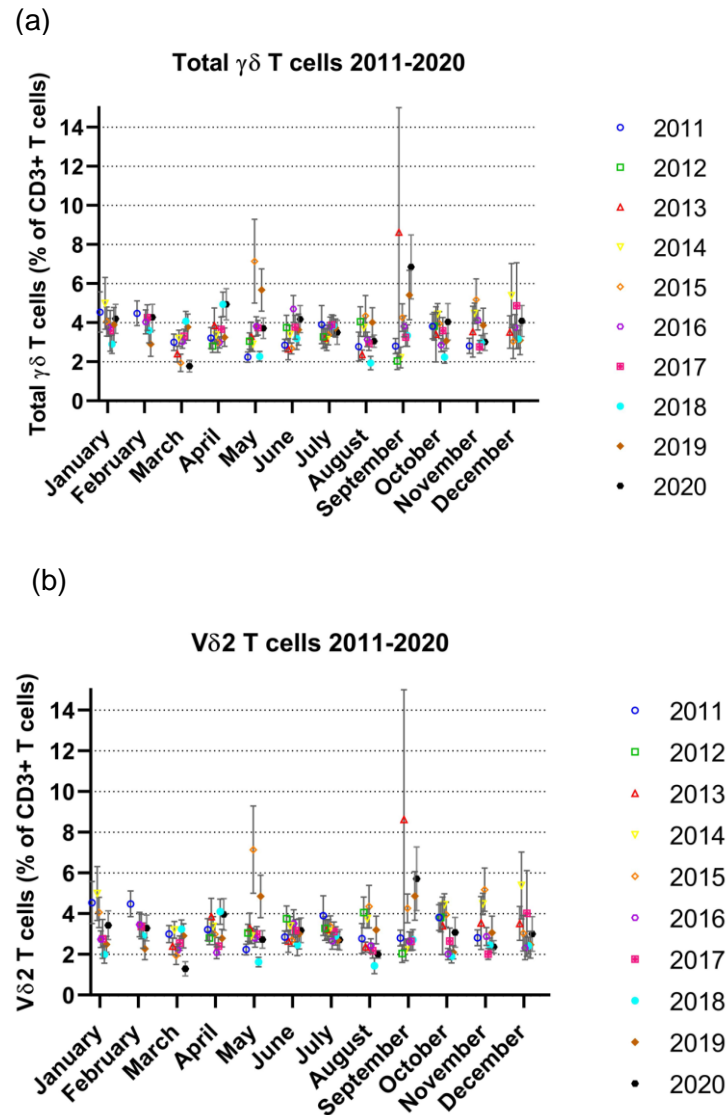

Mean values  $\pm$  SEM of the proportion of total  $\gamma\delta$  T cells (a) and V $\delta$ 2 T cells (b) within CD3 T cells in all donors according to the month of analysis. The total number of analyses in each year was: 2011: 210, 2012: 69, 2013: 100, 2014: 262, 2015: 218, 2016: 474, 2017: 418, 2018: 334, 2019: 270, 2020: 270

## Supplemental Figure S3:

### Gating strategy for prospective analysis

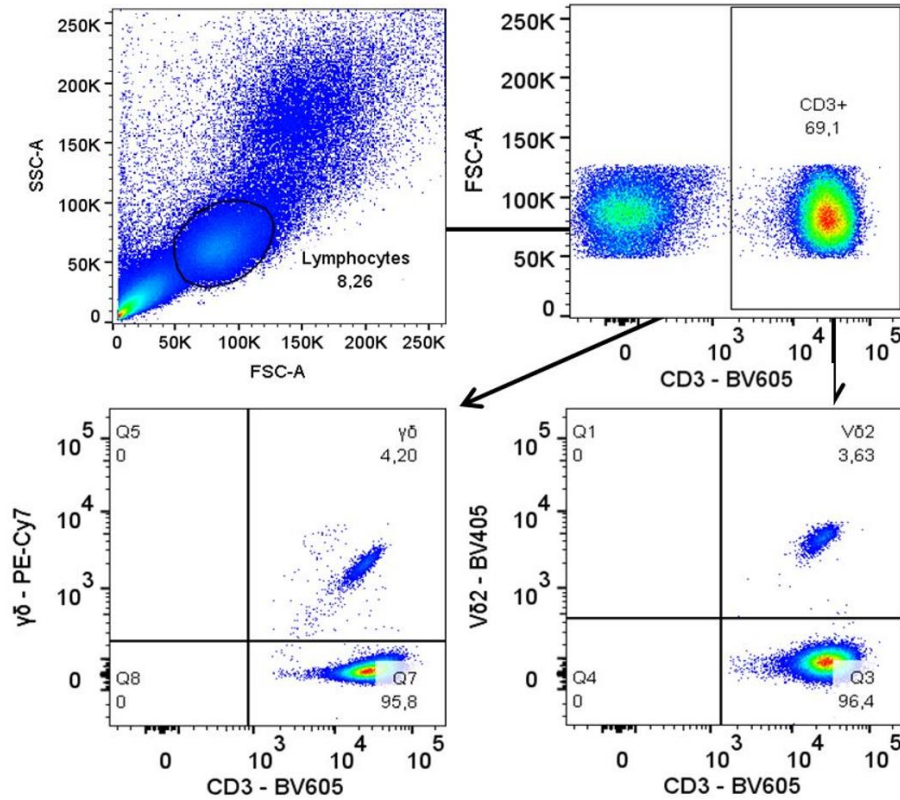

A gate was set on lymphocytes in whole blood based on forward scatter (FSC) and side scatter (SSC) (upper left). Next, CD3<sup>+</sup> T cells were identified (upper right), and CD3<sup>+</sup> T cells were then gated according to CD3 and TCR $\gamma\delta$  expression (lower left) and CD3 and V $\delta$ 2 expression (lower right).

**Supplemental Figure S4:**  
**Correlation of V $\delta$ 2 T cells with serum 25(OH)D<sub>3</sub> levels**

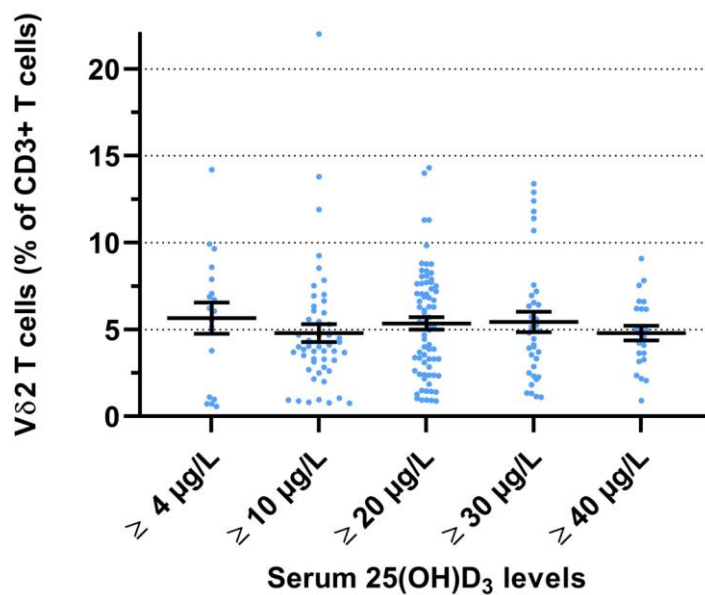

The proportion of V $\delta$ 2 T cells among CD3<sup>+</sup> T cells of each individual donor in the prospective study was plotted against the serum level of 25(OH)D<sub>3</sub> measured at the same day. The levels of 25(OH)D<sub>3</sub> were grouped as indicated on the Y axis.

### Supplemental Figure S5:

#### Seasonal analysis of non-V $\delta$ 2 $\gamma\delta$ T cells and correlation with Vitamin D<sub>3</sub> in the prospective analysis

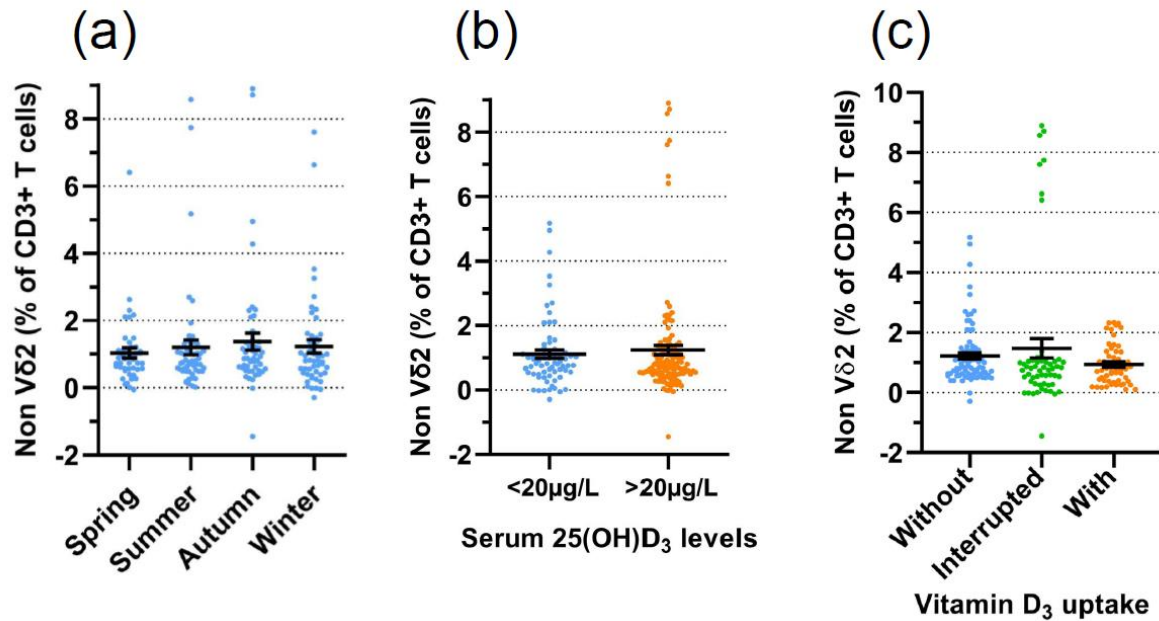

Non-V $\delta$ 2  $\gamma\delta$  T cells (mainly comprising V $\delta$ 1  $\gamma\delta$  T cells) were identified as CD3<sup>+</sup>TCR $\gamma\delta$ V $\delta$ 2<sup>-</sup>. The proportion of non-V $\delta$ 2  $\gamma\delta$  T cells among CD3 T cells was analyzed according to the season in all donors of the prospective study (a). The proportion of non-V $\delta$ 2  $\gamma\delta$  T cells was also analyzed in correlation to serum levels of 25(OH)D<sub>3</sub> (b) and to oral Vitamin D<sub>3</sub> supplementation (c). The definition the three groups in (c) is the same as in Figures 2 and 3 of the main manuscript.

## Supplemental Figure S6:

### Seasonal variation of $\gamma\delta$ T cells: correlation with serum 25(OH) $D_3$ levels

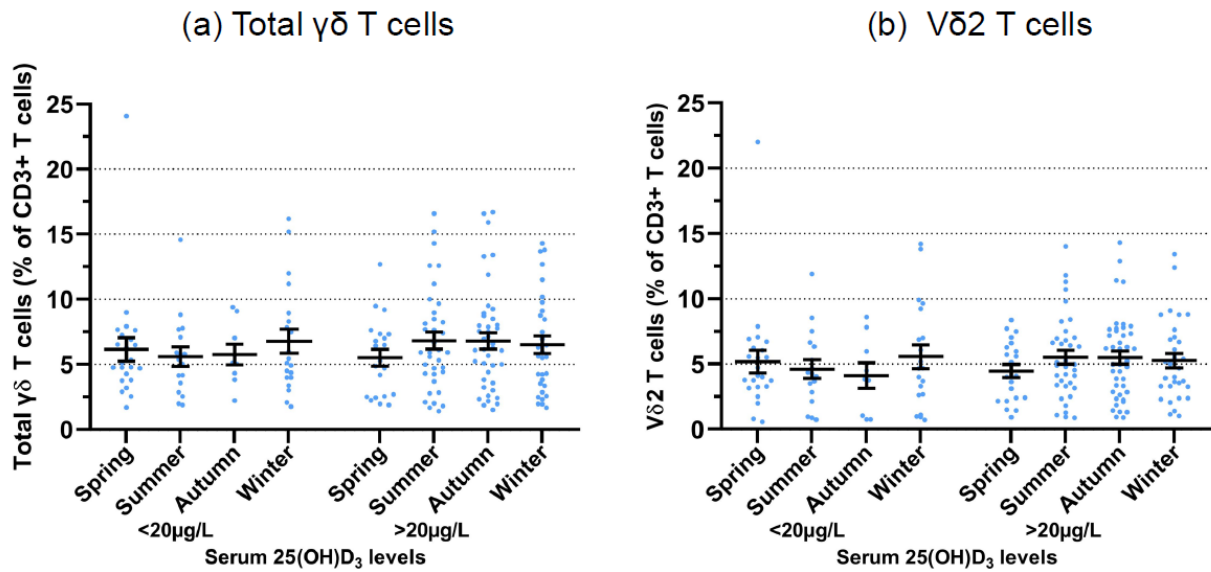

Proportions of total  $\gamma\delta$  (a) and V $\delta$ 2 T cells (b) among CD3<sup>+</sup> T cells were measured in blood samples from all donors in the prospective study. Mean values  $\pm$  SEM and individual data points are displayed according to the season and according to the serum level of 25(OH) $D_3$ : low (left panels: < 20  $\mu$ g/L), normal (right panels: > 20  $\mu$ g/L).



## Supplemental Figure S7:

### Growth inhibition of Zoledronate-activated PBMC by $1\alpha,25(\text{OH})_2\text{D}_3$

(a) Macroscopic inspection

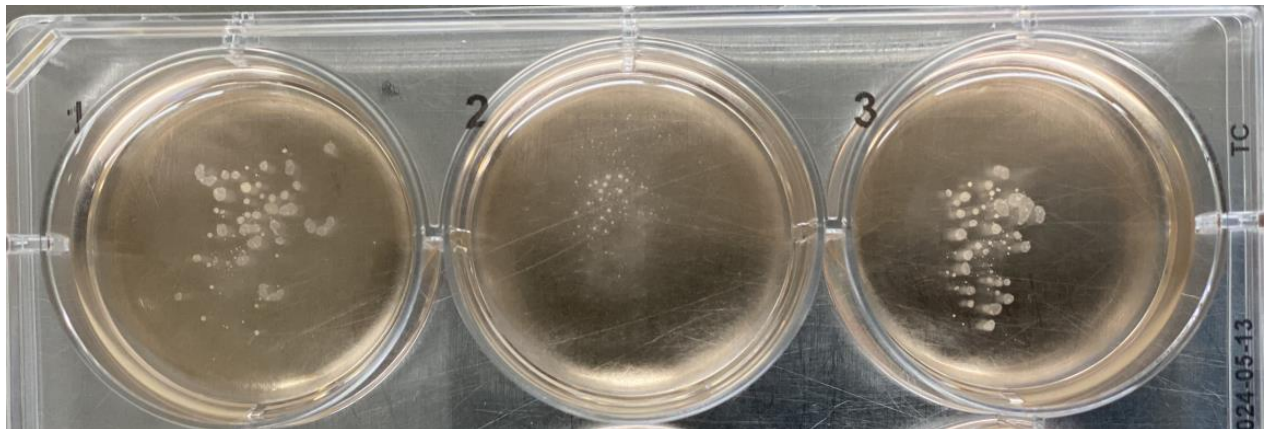

ZOL

ZOL + 50nM  $1\alpha,25(\text{OH})_2\text{D}_3$

ZOL + DMSO 1:1000

(b) Microscopic pictures (x100)

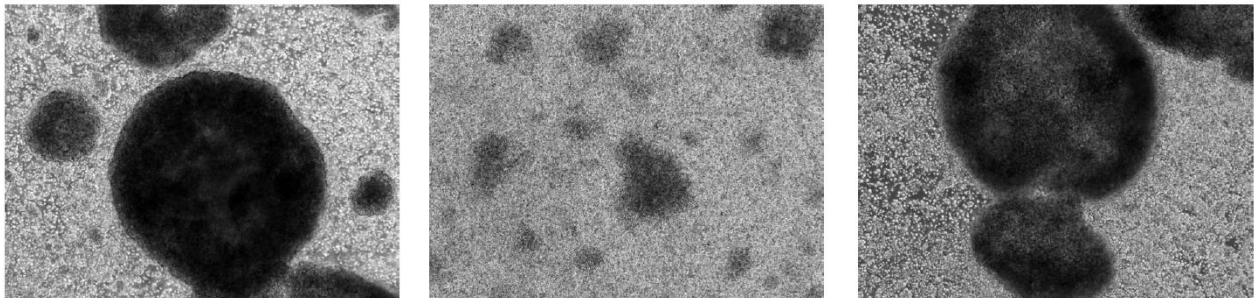

ZOL

ZOL + 50nM  $1\alpha,25(\text{OH})_2\text{D}_3$

ZOL + DMSO 1:1000

PBMC were cultured at  $1 \times 10^6$  cells/mL in 6-well plates (5 mL per well) in the presence of 2.5  $\mu\text{M}$  zoledronate (ZOL) plus 50 IU/mL IL-2 and 50 nM  $1\alpha,25(\text{OH})_2\text{D}_3$  or corresponding solvent control DMSO (1:1000). Pictures were taken after 6 d. (a) Macroscopic inspection; (b) microscopic pictures at 100x magnification

## Supplemental Figure S8:

### Influence of $1\alpha,25(\text{OH})_2\text{D}_3$ on cell death of V $\gamma$ 9 T cells

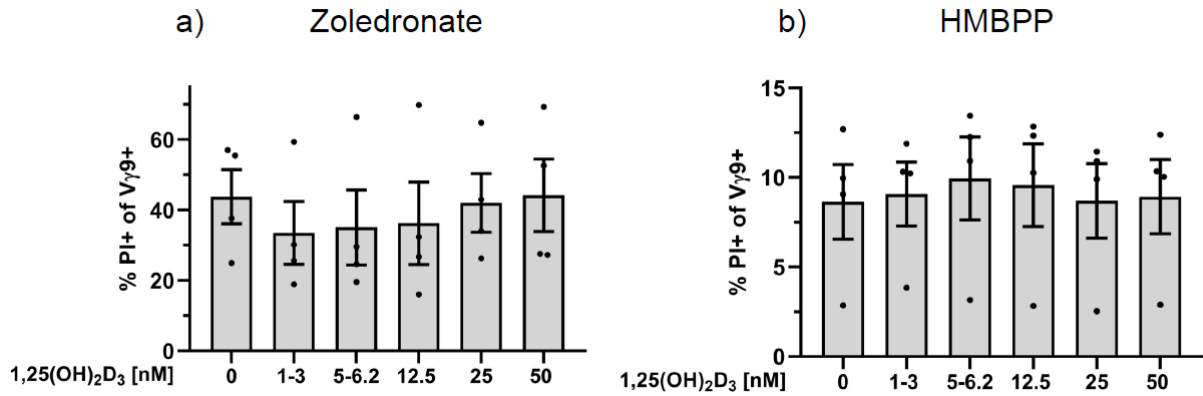

PBMC were stimulated with 2.5  $\mu\text{M}$  ZOL (a) or 10 nM HMBPP (b) in the absence or presence of titrated concentrations of  $1\alpha,25(\text{OH})_2\text{D}_3$  as indicated. After 8 d, the number of viable V $\gamma$ 9 T cells was determined by SCDA (see Figure 5). In parallel, the proportion of dead (PI+) V $\gamma$ 9 T cells was analyzed. Mean values + SEM of four independent experiments are shown.
